# Supplementary material for: Carbon dots functionalized papers for high-throughput sensing of 4-chloroethcathinone and its analogues in crime sites
Source: R Soc Open Sci. 2019 Sep 11;6(9):191017. doi: 10.1098/rsos.191017 (PMC6774952; doi:10.1098/rsos.191017)
Supplement: Supplementary Information [file rsos191017supp1.docx]

**Supplementary information**

Carbon Dots Functionalized Papers for High-Throughput Sensing of 4-Chloroethcathinone and its analogues in Crime Sites †

Yao-Te Yen1,2, Yu-Syuan Lin1, Ting-Yueh Chen2, San-Chong Chyueh2, and Huan-Tsung Chang 2,3*

1Department of Chemistry, National Taiwan University, Taipei 10617, Republic of China (Taiwan)

2Department of Forensic Science, Investigation Bureau, Ministry of Justice, Xindian Dist, New Taipei City 23149, Republic of China (Taiwan)

3Department of Chemistry, Chung Yuan Christian University, Chungli District, Taoyuan City 32023, Republic of China (Taiwan)

**Correspondence:** Prof. Huan-Tsung Chang, Department of Chemistry, National Taiwan University, 1, Section 4, Roosevelt Road, Taipei 10617, Taiwan; E-mail: [changht@ntu.edu.tw](mailto:changht@ntu.edu.tw); Tel: 011-886-2-3366-1171

**Keywords:** sensor, carbon dots, abuse drugs, cathinones, cocaine.


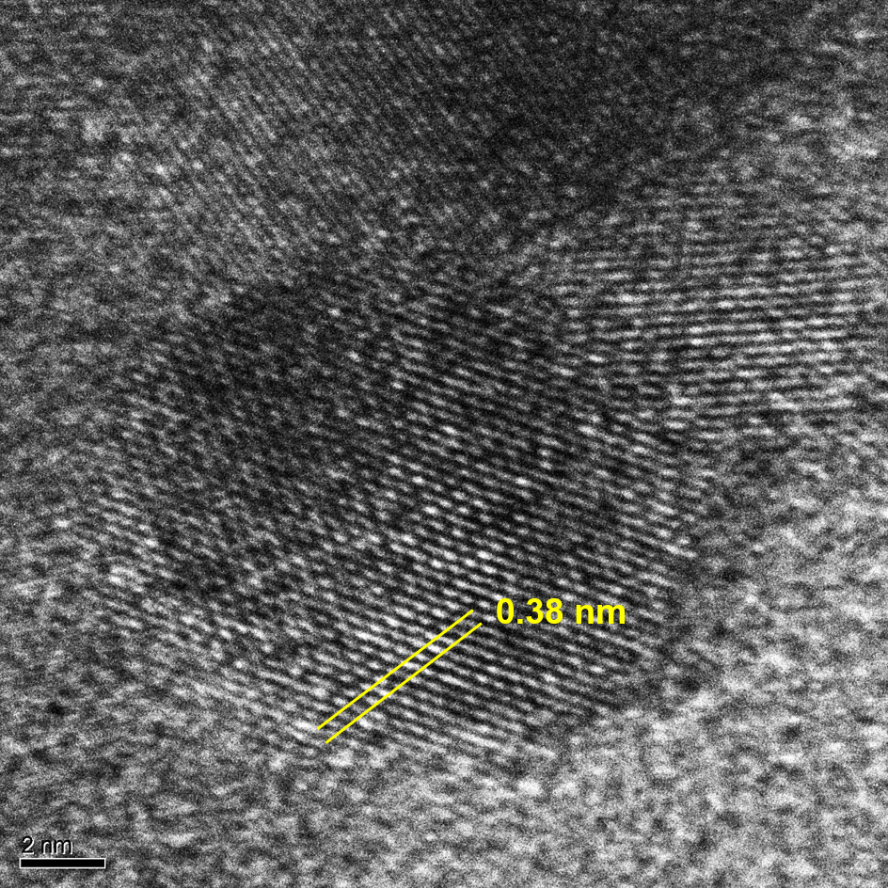


**Figure S1**. HRTEM image of C-dots.


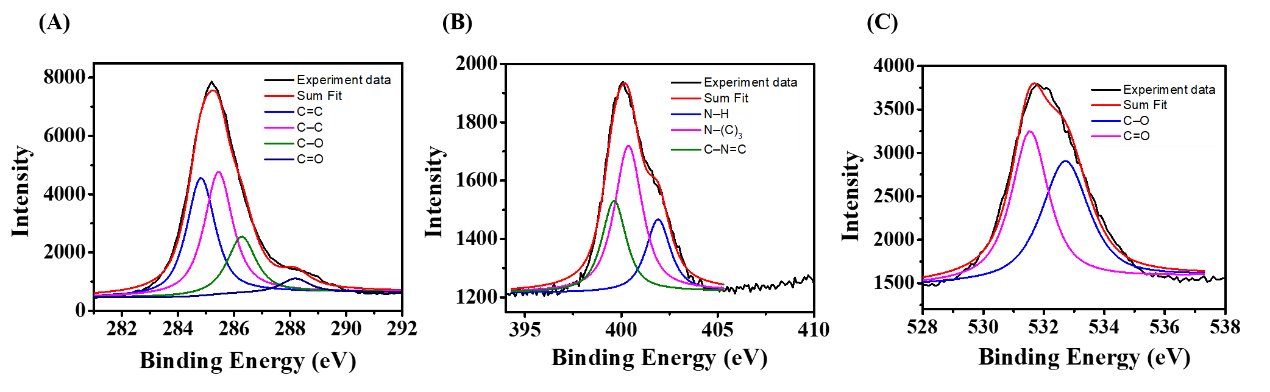


**Figure S2**. Deconvoluted (A) C1s, (B) N1s, and (C) O1s XPS spectra of C-dots.


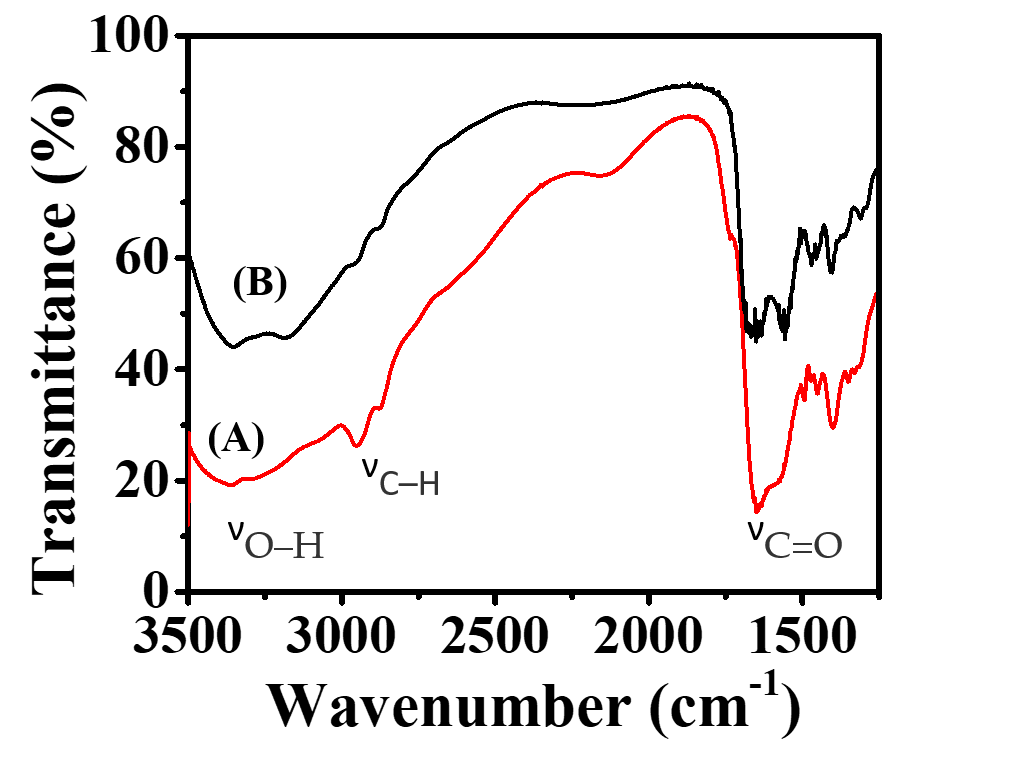


**Figure S3.** FTIR spectra of (A) the C-dots and (B) arginine.


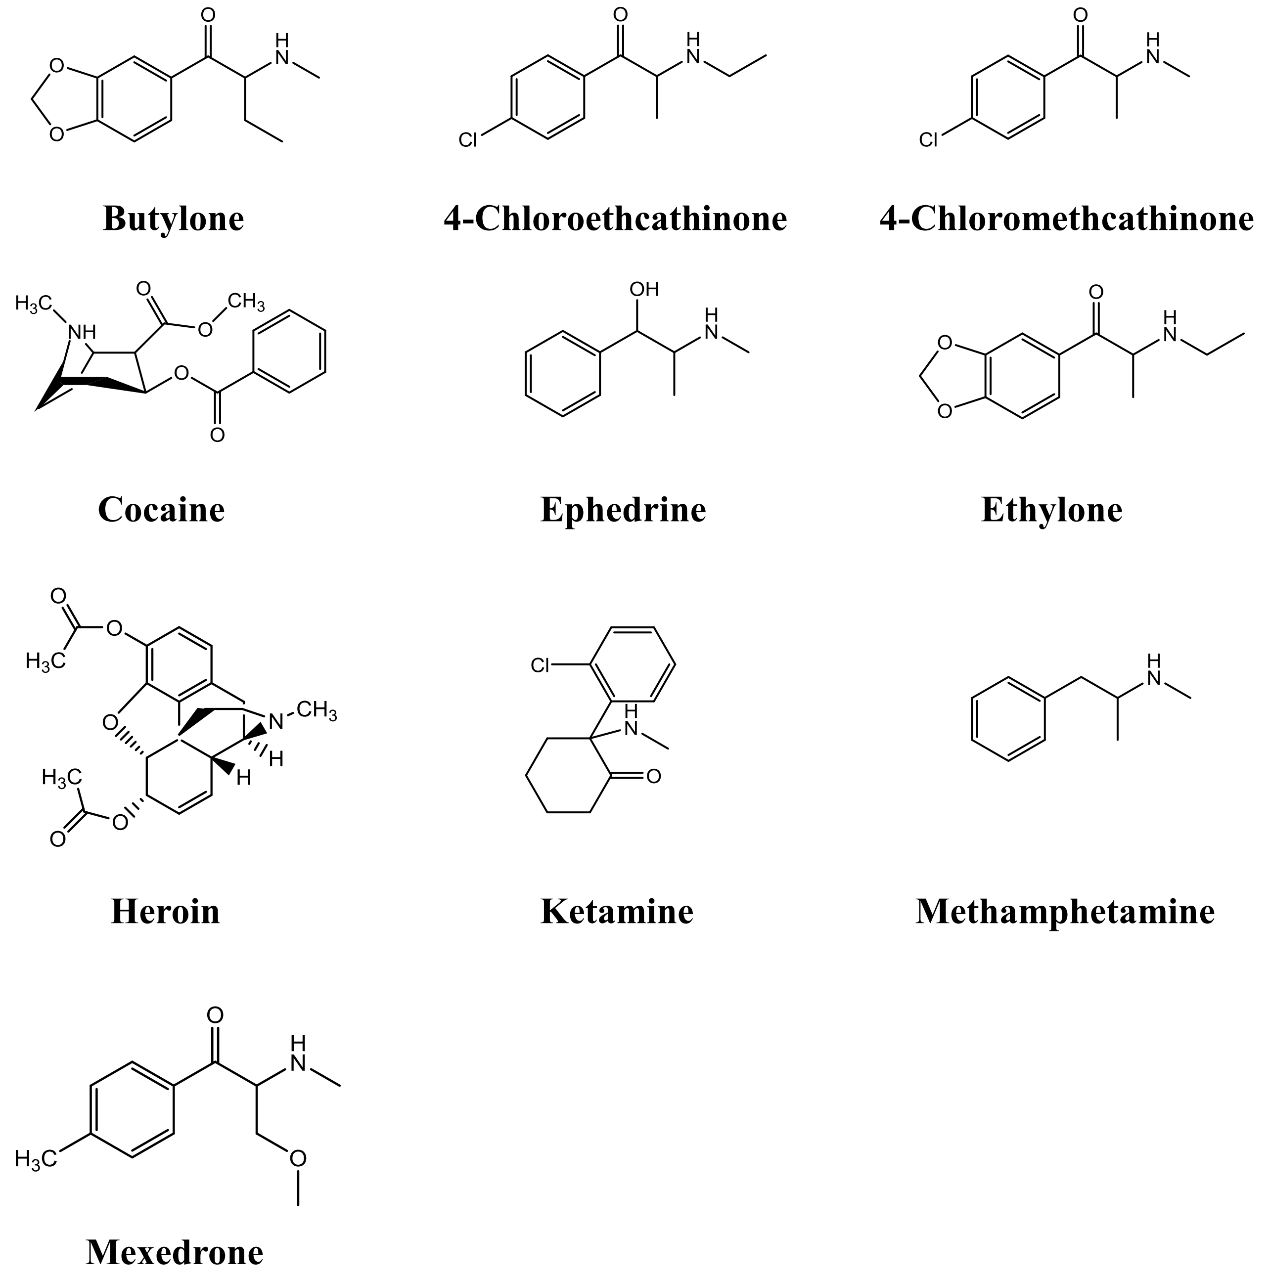


**Figure S4**. Structures for some tested abused drugs.


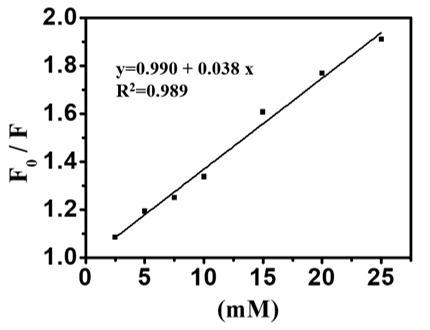


**Figure S5**. Stern-Volmer plot of C-dots in sodium phosphate buffer (90 mM, pH 11.0) for 4-chloroethcathinone. Stern-Volmer equation: F0 / F = 1 + KSV [Q], where F0 and F are the PL intensities of C-dots in the absence and presence of 4-chloroethcathinone, respectively, [Q] is the concentration of 4-chloroethcathinone, and KSV is the quenching constant for 4-chloroethcathinone.


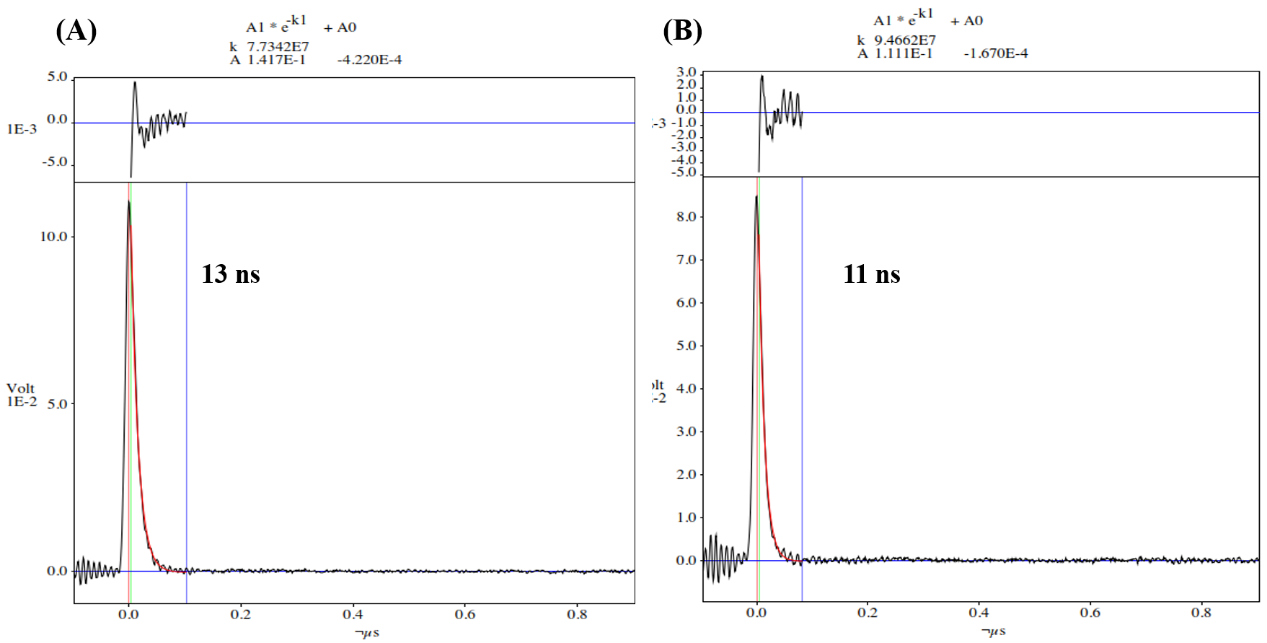


**Figure S6.** Fluorescence lifetime decay curves of C-dots (A) without and (B) with containing 4-chloroethcathine (15 mM) at emission/excitation wavelength of 430/360 nm.


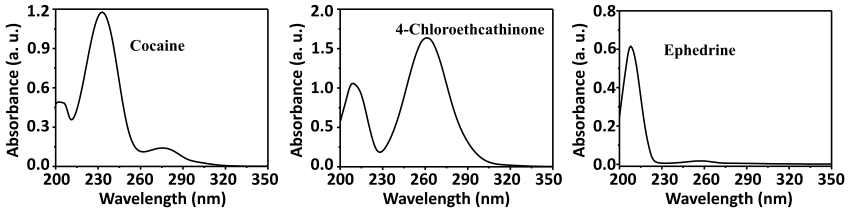


**Figure S7**. Absorption spectra of cocaine, 4-chloroethcathinone, and ephedrine.
